# Supplementary material for: Macrophage Inflammatory State Influences Susceptibility to Lysosomal Damage
Source: bioRxiv or medRxiv preprint supplement (doi:10.1101/2020.05.29.122390), 2020-05-31
Supplement: Supplementary file [file media-1.pdf]

# **Supplemental Materials**

*Journal of Leukocyte Biology*

Wong et al.

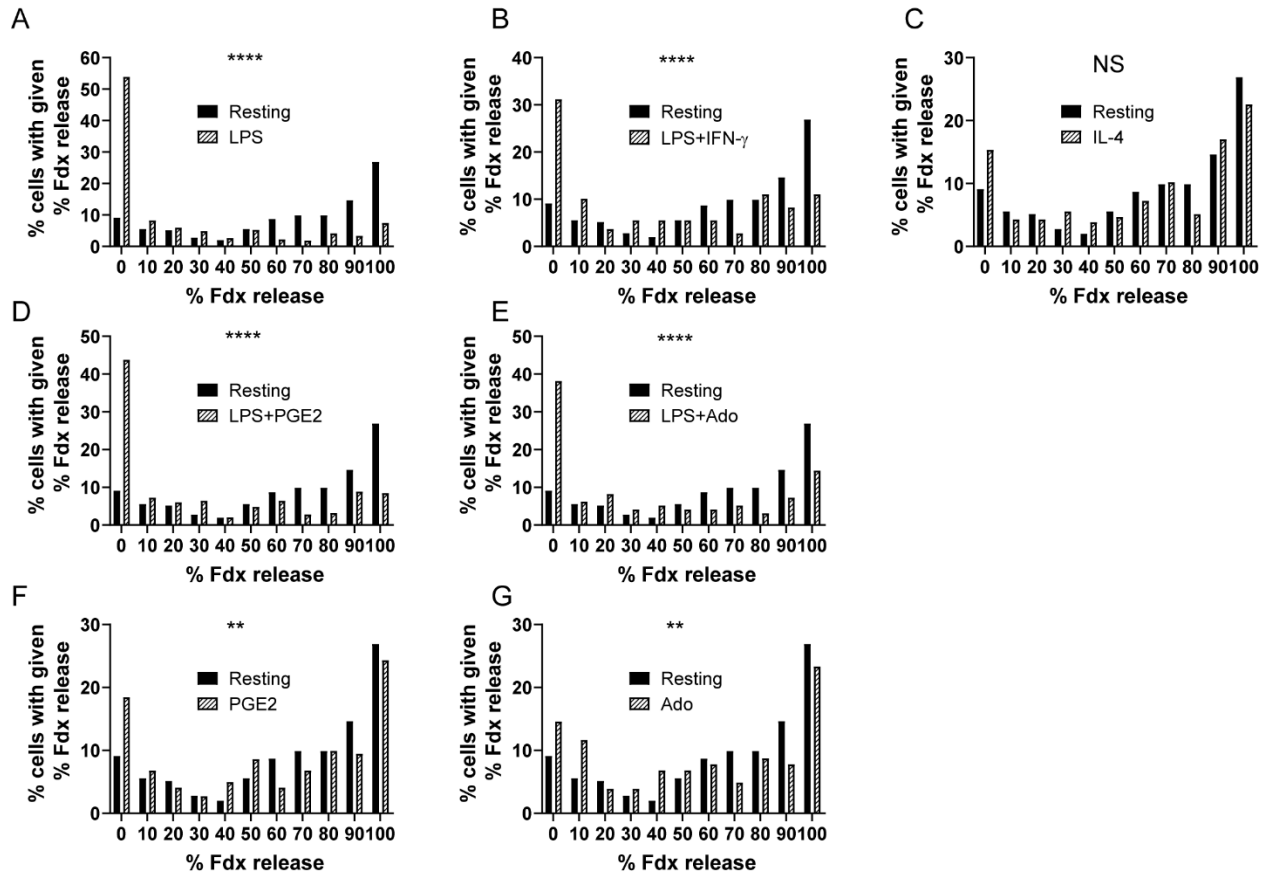

**Supplemental Figure 1: Frequency distributions of data sets in Figure 1C.**

For each bead-positive condition analyzed in Figure 1C, individual cell data was plotted in histogram form to depict the percent of cells within each condition experiencing a given level of lysosomal damage. The relative frequency in percentages (y-axis) of a given level of % Fdx release (represented in increments of 10% on the x-axis) for each treatment condition was plotted and compared with the frequency distribution of % Fdx release values for resting BMM. The frequency distribution for resting BMM was compared with that for BMM stimulated with LPS (A), LPS+IFN- $\gamma$  (B), IL-4 (C), LPS+PGE2 (D), LPS+Ado (E), PGE2 (F), Ado (G). Statistical significance of the difference between each pair of frequency distributions was determined using the Kolmogorov-Smirnov test. Shown are pooled cell data from two to four independent experiments ( $n > 97$  cells per condition). NS: no significant difference,  $**p \leq 0.01$ ,  $****p \leq 0.0001$ .

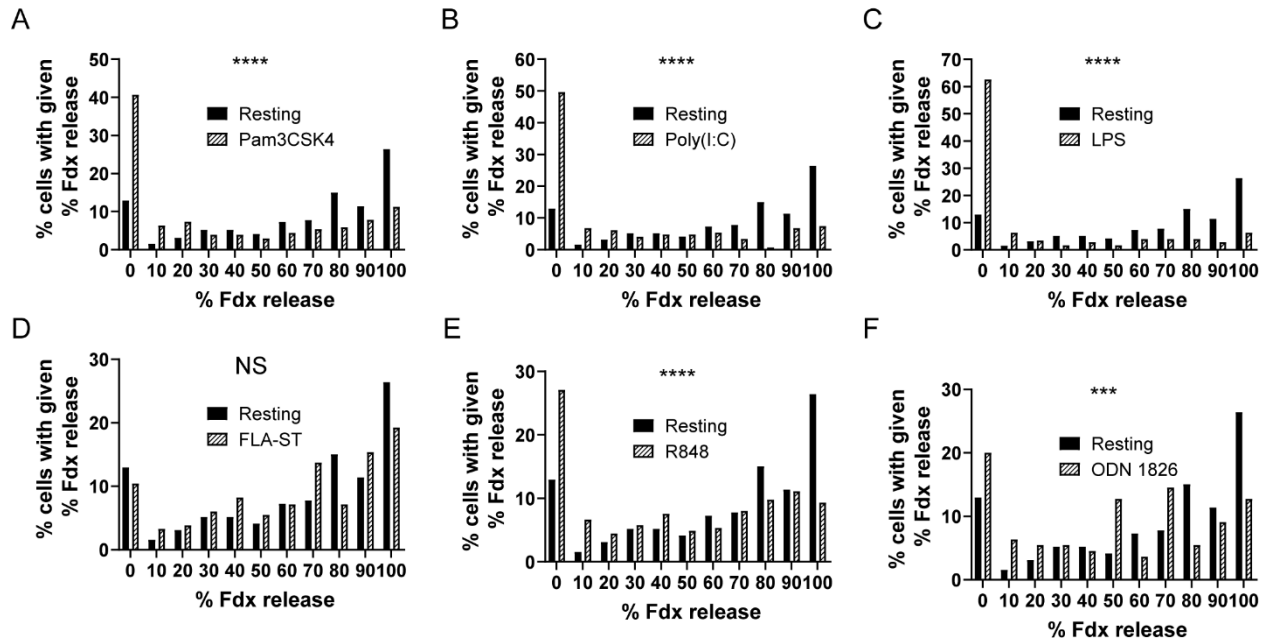

**Supplemental Figure 2: Frequency distributions of data sets in Figure 2A.**

Histograms depicting the percent of cells (y-axis) experiencing a given level of % Fdx release (represented in bins of 10% on the x-axis) based on individual cell data from each bead-positive condition analyzed in Figure 2A. The frequency distribution for resting BMM was compared with that for BMM stimulated with the following TLR agonists: (A) Pam3CSK4, (B) Poly(I:C), (C) LPS, (D) FLA-ST, (E) R848, (F) ODN 1826. Shown are pooled cell data from two or three independent experiments ( $n > 110$  cells per condition). NS: no significant difference,  $***p \leq 0.001$ ,  $****p \leq 0.0001$ .

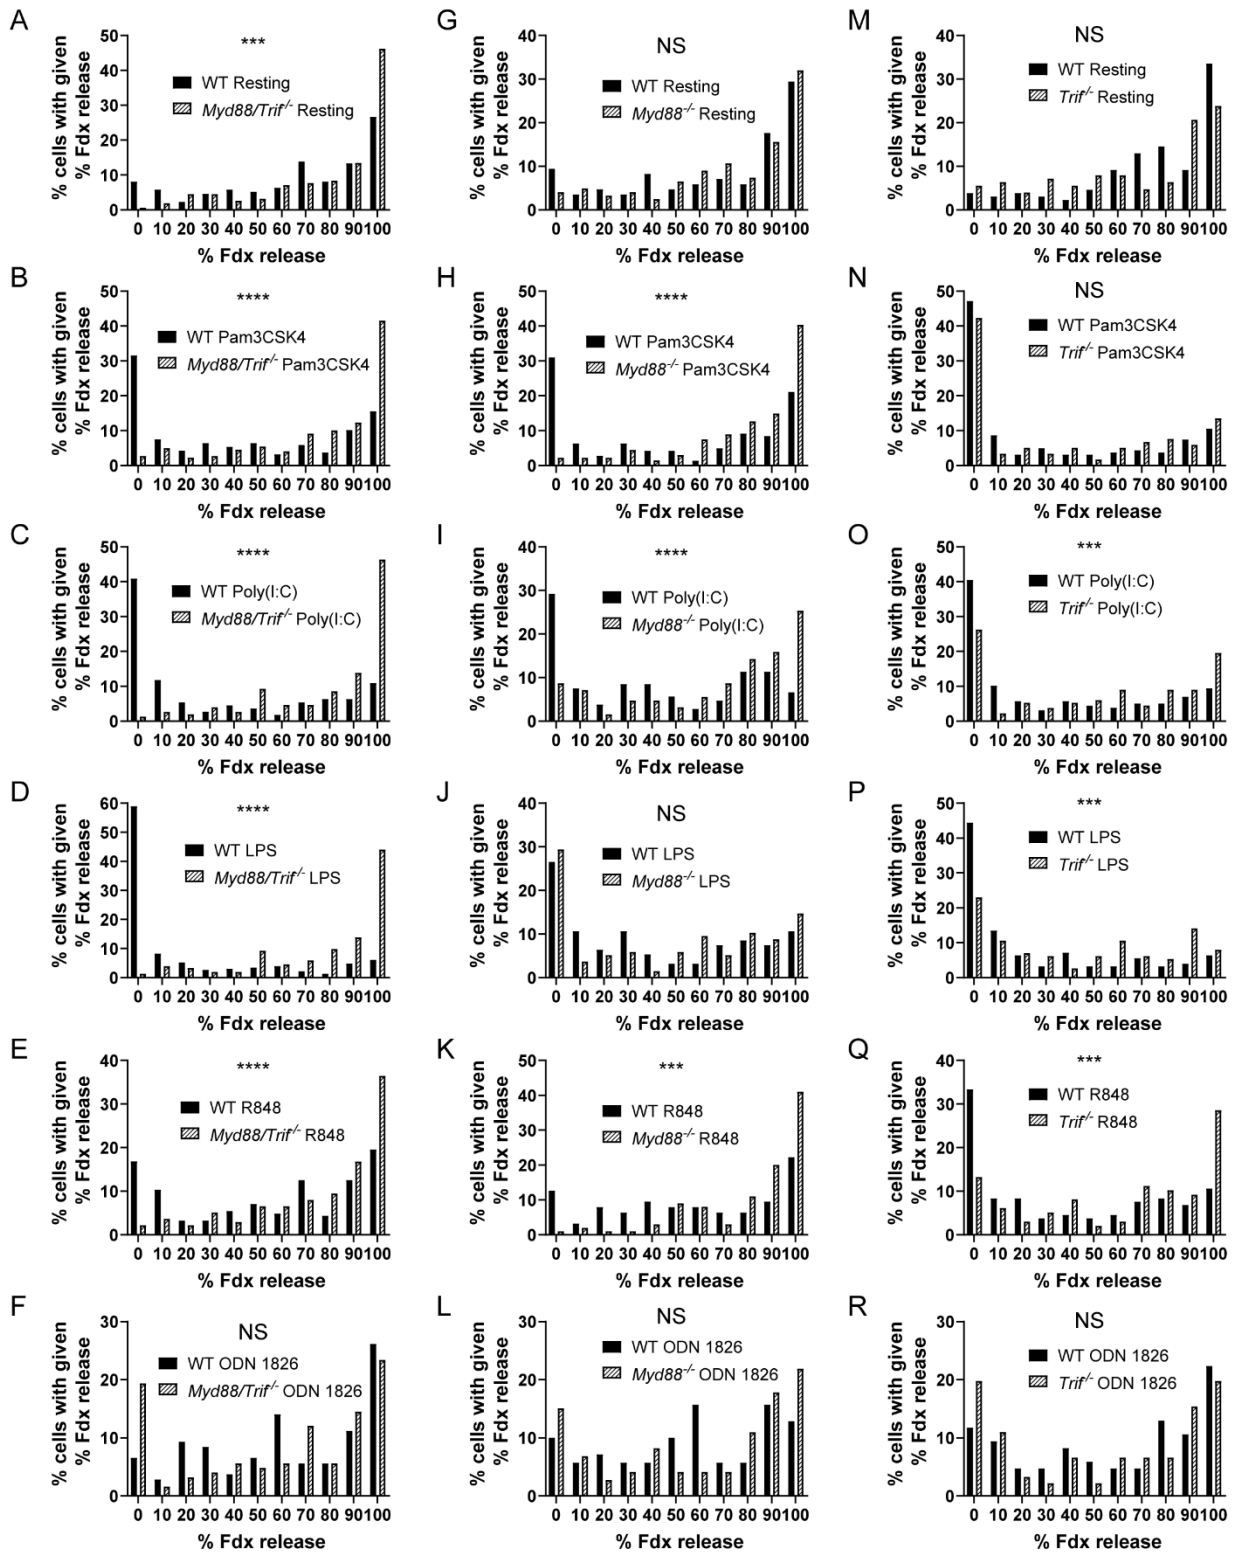

### **Supplemental Figure 3: Frequency distributions of data sets in Figure 3.**

Histograms depicting the percent of cells (y-axis) experiencing a given level of % Fdx release (represented in bins of 10% on the x-axis) based on individual cell data from each bead-positive condition analyzed in Figure 3. To visualize the effect of each genetic knockout on the distribution of damage for each stimulation condition, the frequency distribution for a given stimulation condition was compared between WT and *Myd88/Trif*<sup>-/-</sup> BMM (A-F), WT and *Myd88*<sup>-/-</sup> BMM (G-L), and WT and *Trif*<sup>-/-</sup> BMM (M-R). Shown are pooled cell data from two independent experiments (n > 107 cells for A-F, n > 63 cells for G-L, n > 85 cells for M-R). NS: no significant difference, \*\*\* $p \leq 0.001$ , \*\*\*\* $p \leq 0.0001$ .

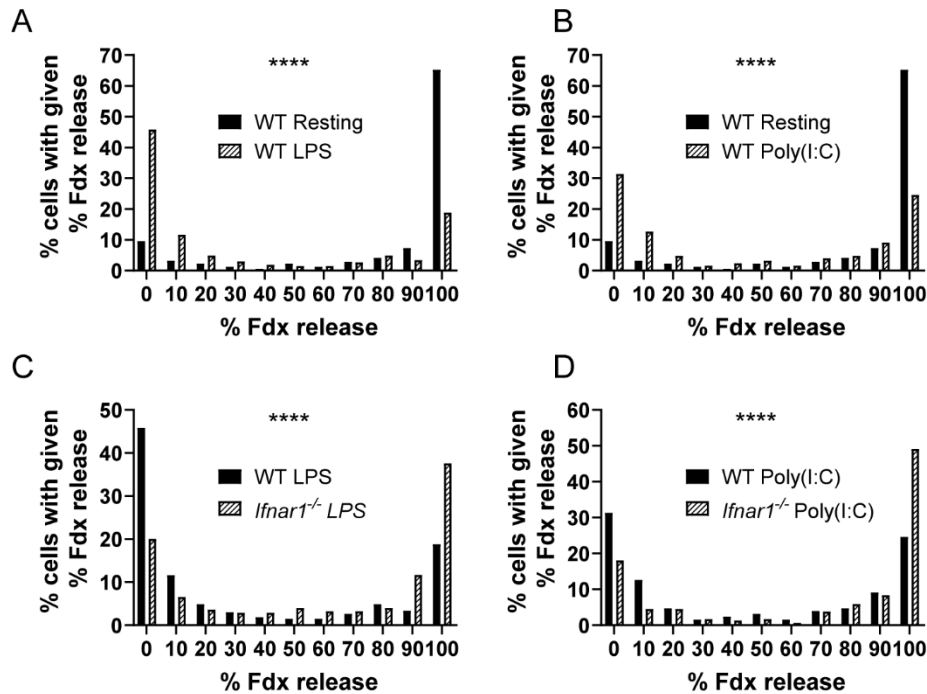

**Supplemental Figure 4: Frequency distributions of data sets in Figure 4.**

Histograms depicting the percent of cells (y-axis) experiencing a given level of % Fdx release (represented in bins of 10% on the x-axis) based on individual cell data from each bead-positive condition analyzed in Figure 4. In the top panel, the frequency distribution for resting WT BMM was compared with that for WT BMM stimulated with LPS (A) or poly(I:C) (B). In the bottom panel, the frequency distribution for each given stimulation condition was compared between WT and *Ifnar1*<sup>-/-</sup> BMM. Shown are pooled cell data from three independent experiments (n > 252 cells per condition). \*\*\*\**p* ≤ 0.0001.

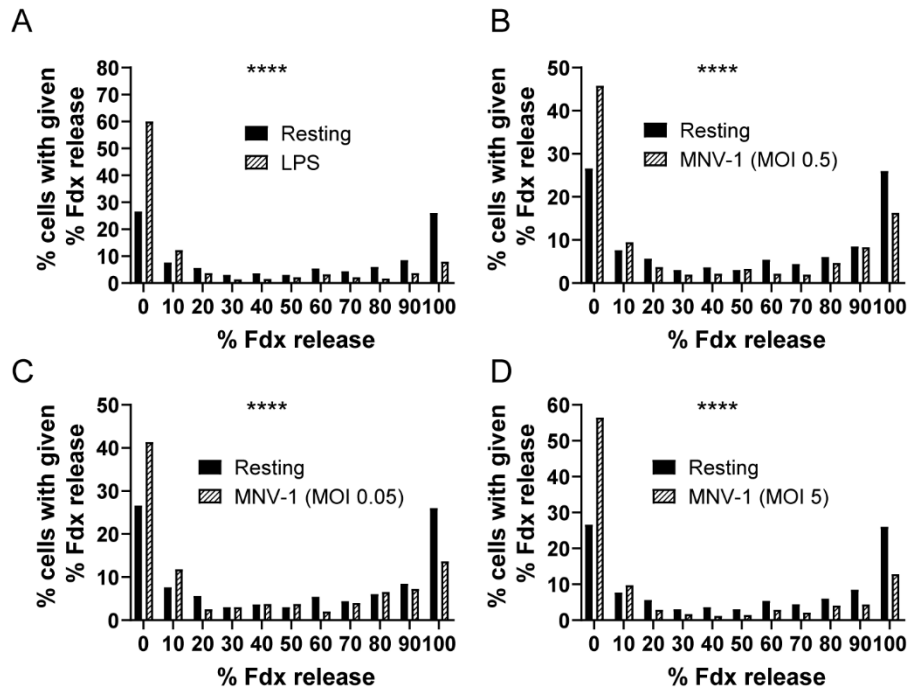

**Supplemental Figure 5: Frequency distributions of data sets in Figure 5.**

Histograms depicting the percent of cells (y-axis) experiencing a given level of % Fdx release (represented in bins of 10% on the x-axis) based on individual cell data from each bead-positive condition analyzed in Figure 5. The frequency distribution for resting BMM was compared with that for BMM stimulated with LPS (A) or infected with MNV-1 at one of three MOIs (0.05, 0.5, 5; B-D) before being subjected to lysosomal damage. Shown are pooled cell data from five independent experiments ( $n > 396$  cells per condition). \*\*\*\* $p \leq 0.0001$ .

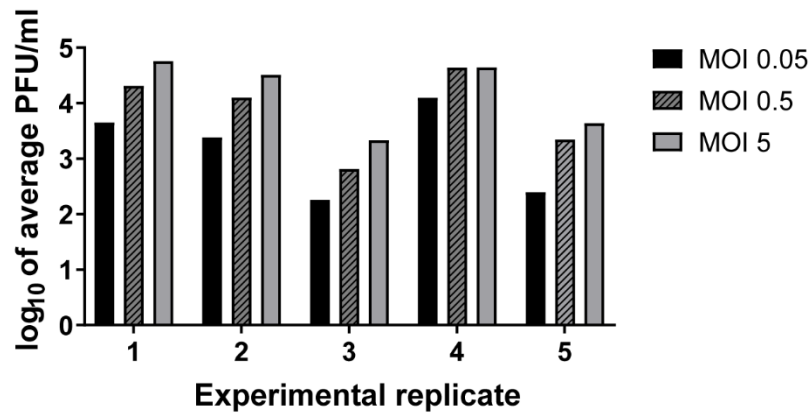

**Supplemental Figure 6: MNV-1 infects BMM in an MOI-dependent manner at 18 hours post-infection in 5 different experiments.**

WT BMM were infected with MNV-1 at three different MOIs (0.05, 0.5 and 5). Viral titers in cell culture lysates were measured by virus titration using a plaque assay and reported as plaque forming units/ml (PFU/ml). Bars show MNV-1 infection titers of three different MOIs from 5 independent experiments performed in duplicate or triplicate. These assays were performed in parallel with the viral infections for the lysosomal damage experiments described in Figure 5.
